# Supplementary material for: Clostridioides difficile from Fecally Contaminated Environmental Sources: Resistance and Genetic Relatedness from a Molecular Epidemiological Perspective
Source: MDPI journal article supplement (doi:10.3390/microorganisms11102497), 2023-10-05
Supplement: s1 [file s1]

## Supplementary Materials

**Table S1:** Phenotypic and genotypic characterization of environmental *C. difficile* isolates.

| Isolate No. | Source | RTs   | STs    | MLST calde | Toxin genes       | Binary toxins | AR profile | AMR genes                                                                                                                                          | Mutations and amino acid substitution                                      |
|-------------|--------|-------|--------|------------|-------------------|---------------|------------|----------------------------------------------------------------------------------------------------------------------------------------------------|----------------------------------------------------------------------------|
| RSS1        | RSS    | RT005 | ST6    | 1          | <i>tcdA, tcdB</i> |               |            | 23S rRNA, <i>blaCDD-1, vanZ1, vanS, vanG, vanT, gyrA, gyrB</i>                                                                                     | 23S rRNA: C665T                                                            |
| RSS2        |        | RT090 | ST1073 | UC         | <i>tcdA, tcdB</i> |               |            | 23S rRNA, <i>blaCDD-1, vanZ1, vanS, vanG, vanT, cdeA, gyrA, gyrB</i>                                                                               | 23S rRNA: C665T                                                            |
| RSS3        |        | RT011 | ST36   | 1          | <i>tcdA, tcdB</i> |               |            | 23S rRNA, <i>blaCDD-1, vanS, vanG, vanT, cdeA, gyrA, gyrB</i>                                                                                      | 23S rRNA: C665T                                                            |
| RSS4        |        | UC    | ST6    | 1          | <i>tcdA, tcdB</i> |               |            | 23S rRNA, <i>blaCDD-1, vanZ1, vanS, vanG, vanT, gyrA, gyrB</i>                                                                                     | 23S rRNA: C665T                                                            |
| RSS5        |        | RT020 | ST2    | 1          | <i>tcdA, tcdB</i> |               |            | 23S rRNA, <i>blaCDD-1, vanZ1, vanS, vanG, vanT, gyrA, gyrB</i>                                                                                     | 23S rRNA: C665T                                                            |
| RSS6        |        | RT070 | ST55   | 1          | <i>tcdA, tcdB</i> |               |            | 23S rRNA, <i>blaCDD-2, vanZ1, vanS, vanG, vanT, gyrA, gyrB</i>                                                                                     | 23S rRNA: C665T                                                            |
| RSS7        |        | RT159 | ST8    | 1          | <i>tcdA, tcdB</i> |               |            | 23S rRNA, <i>blaCDD-1, vanZ1, vanS, vanG, vanT, gyrA, gyrB</i>                                                                                     | 23S rRNA: C665T                                                            |
| RSS10       |        | RT012 | ST54   | 1          | <i>tcdA, tcdB</i> |               | CLR        | 23S rRNA, <i>blaCDD-2, aac(6')-aph(2''), ermB, cdeA, vanZ1, vanS, vanG, vanT, gyrA, gyrB</i>                                                       | 23S rRNA: C665T                                                            |
| RSS11       |        | RT010 | ST15   | 1          |                   |               | CLR        | 23S rRNA, <i>blaCDD-2, cdeA, ermB, ant(6)-la, vanZ1, vanS, vanG, vanT, gyrA, gyrB</i>                                                              | 23S rRNA: C665T                                                            |
| RSS12       |        | RT140 | ST26   | 1          |                   |               |            | 23S rRNA, <i>blaCDD-1, ermB, ant(6)-la, tet(M), vanZ1, vanS, vanG, vanT, gyrA, gyrB</i>                                                            | 23S rRNA: C665T                                                            |
| RSS13       |        | RT023 | ST5    | 3          | <i>tcdA, tcdB</i> | <i>cdtAB</i>  |            | 23S rRNA, <i>blaCDD-1, vanZ1, gyrA, gyrB</i>                                                                                                       | 23S rRNA: C665T                                                            |
| RSS37       |        | RT031 | ST29   | 1          |                   |               | CLR        | 23S rRNA, <i>blaCDD-1, aac(6')-aph(2''), ermB, tet(M), vanZ1, vanS, vanG, vanT, gyrA, gyrB</i>                                                     | 23S rRNA: C665T                                                            |
| RSS38       |        | RT001 | ST3    | 1          | <i>tcdA, tcdB</i> |               |            | 23S rRNA, <i>blaCDD-1, vanS, vanG, vanT, gyrA, gyrB</i>                                                                                            | 23S rRNA: C665T                                                            |
| RSS39       |        | RT017 | ST37   | 4          | <i>tcdA, tcdB</i> |               | MXF, RIF   | 23S rRNA, <i>blaCDD-2, vanZ1, aac(6')-aph(2''), , tet(M), cfr(B), erm(52), clcD, gyrA, gyrB, rpoB</i>                                              | 23S rRNA: C665T<br><i>gyrA</i> : T82I<br><i>rpoB</i> : His502Asn/Arg505Lys |
| RSS52       |        | RT140 | ST26   | 1          |                   |               | CLR, MXF   | 23S rRNA, <i>blaCDD-1, vanZ1, vanS, vanG, vanT, aph(2'')-If, tet(M), tet(O), ermB, ant(6)-la, gyrA, gyrB</i>                                       | 23S rRNA: C665T                                                            |
| RSS61       |        | RT127 | ST11   | 5          | <i>tcdA, tcdB</i> | <i>cdtAB</i>  |            | 23S rRNA, <i>blaCDD-1, vanZ1, aph(3')-IIIa, tet(M), gyrA, gyrB</i>                                                                                 | 23S rRNA: C665T                                                            |
| RSS62       |        | RT127 | ST11   | 5          | <i>tcdA, tcdB</i> | <i>cdtAB</i>  |            | 23S rRNA, <i>blaCDD-1, vanZ1, aph(3')-IIIa, tet(M), gyrA, gyrB</i>                                                                                 | 23S rRNA: C665T                                                            |
| RSS63       |        | RT127 | ST11   | 5          | <i>tcdA, tcdB</i> | <i>cdtAB</i>  |            | 23S rRNA, <i>blaCDD-1, vanZ1, aph(3')-IIIa, tet(M), gyrA, gyrB</i>                                                                                 | 23S rRNA: C665T                                                            |
| RSS64       |        | RT127 | ST11   | 5          | <i>tcdA, tcdB</i> | <i>cdtAB</i>  |            | 23S rRNA, <i>blaCDD-1, vanZ1, aph(3')-IIIa, tet(M), gyrA, gyrB</i>                                                                                 | 23S rRNA: C665T                                                            |
| RSS65       |        | RT127 | ST11   | 5          | <i>tcdA, tcdB</i> | <i>cdtAB</i>  |            | 23S rRNA, <i>blaCDD-1, vanZ1, aph(3')-IIIa, tet(M), gyrA, gyrB</i>                                                                                 | 23S rRNA: C665T                                                            |
| RSS66       |        | RT127 | ST11   | 5          | <i>tcdA, tcdB</i> | <i>cdtAB</i>  |            | 23S rRNA, <i>blaCDD-1, vanZ1, aph(3')-IIIa, tet(M), gyrA, gyrB</i>                                                                                 | 23S rRNA: C665T                                                            |
| RSS67       |        | RT127 | ST11   | 5          | <i>tcdA, tcdB</i> | <i>cdtAB</i>  |            | 23S rRNA, <i>blaCDD-1, vanZ1, aph(3')-IIIa, tet(M), gyrA, gyrB</i>                                                                                 | 23S rRNA: C665T                                                            |
| RSS68       |        | RT127 | ST11   | 5          | <i>tcdA, tcdB</i> | <i>cdtAB</i>  |            | 23S rRNA, <i>blaCDD-1, vanZ1, aph(3')-IIIa, tet(M), gyrA, gyrB</i>                                                                                 | 23S rRNA: C665T                                                            |
| RS8         | RS     | RT015 | ST44   | 1          | <i>tcdA, tcdB</i> |               |            | 23S rRNA, <i>blaCDD-1, vanZ1, vanS, vanG, vanT, gyrA, gyrB</i>                                                                                     | 23S rRNA: C665T                                                            |
| RS9         |        | UC    | ST254  | 4          |                   |               |            | 23S rRNA, <i>blaCDD-2, gyrA, gyrB</i>                                                                                                              | 23S rRNA: C665T                                                            |
| RS14        |        | RT014 | ST14   | 1          | <i>tcdA, tcdB</i> |               |            | 23S rRNA, <i>blaCDD-1, vanS, vanG, vanT, gyrA, gyrB</i>                                                                                            | 23S rRNA: C665T                                                            |
| RS15        |        | RT023 | ST5    | 3          | <i>tcdA, tcdB</i> | <i>cdtAB</i>  |            | 23S rRNA, <i>blaCDD-1, vanZ1, gyrA, gyrB</i>                                                                                                       | 23S rRNA: C665T                                                            |
| RS16        |        | RT018 | ST17   | 1          | <i>tcdA, tcdB</i> |               |            | 23S rRNA, <i>blaCDD-1, vanZ1, vanS, vanG, vanT, gyrA, gyrB</i>                                                                                     | 23S rRNA: C665T                                                            |
| RS17        |        | RT001 | ST3    | 1          | <i>tcdA, tcdB</i> |               |            | 23S rRNA, <i>blaCDD-1, vanS, vanG, vanT, gyrA, gyrB</i>                                                                                            | 23S rRNA: C665T                                                            |
| RS32        |        | RT070 | ST55   | 1          | <i>tcdA, tcdB</i> |               |            | 23S rRNA, <i>blaCDD-2, vanZ1, vanS, vanG, vanT, gyrA, gyrB</i>                                                                                     | 23S rRNA: C665T                                                            |
| RS35        |        | RT012 | ST54   | 1          | <i>tcdA, tcdB</i> |               | CLR        | 23S rRNA, <i>blaCDD-2, vanZ1, vanS, vanG, vanT, cdeA, aac(6')-aph(2''), ermB, tet(M), msrA, mphC, qacR, qacA/B, ant(4')-la, tet(L), gyrA, gyrB</i> | 23S rRNA: C665T                                                            |

**Table S1:** Continued.

| Isolate No. | Source | RTs   | STs   | MLST calde | Toxin genes       | Binary toxins | AR profile | AMR genes                                                                                            | Mutations and amino acid substitution |
|-------------|--------|-------|-------|------------|-------------------|---------------|------------|------------------------------------------------------------------------------------------------------|---------------------------------------|
| RS36        | RS     | RT070 | ST55  | 1          | <i>tcdA, tcdB</i> |               |            | 23S rRNA, <i>blaCDD-2, vanZ1, vanS, vanG, vanT, gyrA, gyrB</i>                                       | 23S rRNA: C665T                       |
| RS43        |        | RT011 | ST325 | 1          | <i>tcdA, tcdB</i> |               |            | 23S rRNA, <i>blaCDD-1, vanZ1, vanS, vanG, vanT, cdeA, gyrA, gyrB</i>                                 | 23S rRNA: C665T                       |
| RS44        |        | RT002 | ST8   | 1          | <i>tcdA, tcdB</i> |               |            | 23S rRNA, <i>blaCDD-1, vanZ1, vanS, vanG, vanT, gyrA, gyrB</i>                                       | 23S rRNA: C665T                       |
| RS147       |        | RT073 | ST109 | 4          |                   |               |            | 23S rRNA, <i>blaCDD-2, vanZ1, aac(6')-aph(2''), ant(6)-la, tetB(P), tetA(P), gyrA, gyrB</i>          | 23S rRNA: C665T                       |
| RS148       |        | RT001 | ST3   | 1          | <i>tcdA, tcdB</i> |               |            | 23S rRNA, <i>blaCDD-1, vanZ1, vanS, vanG, vanT, gyrA, gyrB</i>                                       | 23S rRNA: C665T                       |
| RS149       |        | RT073 | ST109 | 4          |                   |               |            | 23S rRNA, <i>blaCDD-2, vanZ1, aac(6')-aph(2''), ant(6)-la, tetB(P), tetA(P), gyrA, gyrB</i>          | 23S rRNA: C665T                       |
| RS150       |        | RT073 | ST109 | 4          |                   |               |            | 23S rRNA, <i>blaCDD-2, vanZ1, aac(6')-aph(2''), ant(6)-la, tetB(P), tetA(P), gyrA, gyrB</i>          | 23S rRNA: C665T                       |
| RS151       |        | RT073 | ST109 | 4          |                   |               |            | 23S rRNA, <i>blaCDD-2, vanZ1, aac(6')-aph(2''), ant(6)-la, tetB(P), tetA(P), gyrA, gyrB</i>          | 23S rRNA: C665T                       |
| RS152       |        | RT073 | ST109 | 4          |                   |               |            | 23S rRNA, <i>blaCDD-2, vanZ1, aac(6')-aph(2''), ant(6)-la, tetB(P), tetA(P), gyrA, gyrB</i>          | 23S rRNA: C665T                       |
| RS153       |        | RT001 | ST3   | 1          | <i>tcdA, tcdB</i> |               |            | 23S rRNA, <i>blaCDD-1, vanZ1, vanS, vanG, vanT, gyrA, gyrB</i>                                       | 23S rRNA: C665T                       |
| RS154       |        | RT001 | ST3   | 1          | <i>tcdA, tcdB</i> |               |            | 23S rRNA, <i>blaCDD-1, vanZ1, vanS, vanG, vanT, gyrA, gyrB</i>                                       | 23S rRNA: C665T                       |
| RS164       |        | RT073 | ST109 | 4          |                   |               |            | 23S rRNA, <i>blaCDD-2, aac(6')-aph(2''), ant(6)-la, tetB(P), tetA(P), gyrA, gyrB</i>                 | 23S rRNA: C665T                       |
| RS165       |        | RT073 | ST109 | 4          |                   |               |            | 23S rRNA, <i>blaCDD-2, vanZ1, aac(6')-aph(2''), ant(6)-la, tetB(P), tetA(P), gyrA, gyrB</i>          | 23S rRNA: C665T                       |
| DSS18       | DSS    | UC    | ST8   | 1          | <i>tcdA, tcdB</i> |               |            | 23S rRNA, <i>blaCDD-1, vanZ1, vanS, vanG, vanT, gyrA, gyrB</i>                                       | 23S rRNA: C665T                       |
| DSS19       |        | UC    | ST917 | UC         |                   |               |            | 23S rRNA, <i>blaCDD-2, vanZ1, vanS, vanG, vanT, gyrA, gyrB</i>                                       | 23S rRNA: C665T                       |
| DSS26       |        | RT126 | ST11  | 5          | <i>tcdA, tcdB</i> | <i>cdtAB</i>  | CLR        | 23S rRNA, <i>blaCDD-1, vanZ1, aph(3')-IIIa, ant(6)-la, tet(40), tet(M), sat-4, gyrA, gyrB</i>        | 23S rRNA: C665T                       |
| DSS27       |        | RT020 | ST2   | 1          | <i>tcdA, tcdB</i> |               |            | 23S rRNA, <i>blaCDD-1, vanS, vanG, vanT, gyrA, gyrB</i>                                              | 23S rRNA: C665T                       |
| DSS28       |        | RT258 | ST58  | 1          | <i>tcdA, tcdB</i> |               |            | 23S rRNA, <i>blaCDD-1, vanS, vanG, vanT, gyrA, gyrB</i>                                              | 23S rRNA: C665T                       |
| DSS29       |        | RT258 | ST58  | 1          | <i>tcdA, tcdB</i> |               |            | 23S rRNA, <i>blaCDD-1, vanS, vanG, vanT, gyrA, gyrB</i>                                              | 23S rRNA: C665T                       |
| DSS30       |        | RT106 | ST42  | 1          | <i>tcdA, tcdB</i> |               |            | 23S rRNA, <i>blaCDD-1, vanS, vanG, vanT, gyrA, gyrB</i>                                              | 23S rRNA: C665T                       |
| DSS31       |        | RT258 | ST58  | 1          | <i>tcdA, tcdB</i> |               |            | 23S rRNA, <i>blaCDD-1, vanS, vanG, vanT, gyrA, gyrB</i>                                              | 23S rRNA: C665T                       |
| DSS41       |        | RT014 | ST13  | 1          | <i>tcdA, tcdB</i> |               |            | 23S rRNA, <i>blaCDD-1, vanZ1, vanS, vanG, vanT, gyrA, gyrB</i>                                       | 23S rRNA: C665T                       |
| DSS183      |        | RT018 | ST17  | 1          | <i>tcdA, tcdB</i> |               |            | 23S rRNA, <i>blaCDD-1, vanZ1, vanS, vanG, vanT, gyrA, gyrB</i>                                       | 23S rRNA: C665T                       |
| DSS184      |        | RT328 | ST35  | 1          | <i>tcdA, tcdB</i> |               | CLR        | 23S rRNA, <i>blaCDD-1, vanS, vanG, vanT, tet(M), ermB, aac(6')-aph(2''), gyrA, gyrB</i>              | 23S rRNA: C665T                       |
| DSS185      |        | RT328 | ST35  | 1          | <i>tcdA, tcdB</i> |               | CLR        | 23S rRNA, <i>blaCDD-1, vanS, vanG, vanT, tet(M), ermB, aac(6')-aph(2''), gyrA, gyrB</i>              | 23S rRNA: C665T                       |
| DSS186      |        | RT015 | ST44  | 1          | <i>tcdA, tcdB</i> |               |            | 23S rRNA, <i>blaCDD-1, vanZ1, vanS, vanG, vanT, gyrA, gyrB</i>                                       | 23S rRNA: C665T                       |
| DSS187      |        | RT103 | ST53  | 1          | <i>tcdA, tcdB</i> |               |            | 23S rRNA, <i>blaCDD-1, vanZ1, vanS, vanG, vanT, gyrA, gyrB</i>                                       | 23S rRNA: C665T                       |
| DSS188      |        | RT002 | ST8   | 1          | <i>tcdA, tcdB</i> |               |            | 23S rRNA, <i>blaCDD-1, vanZ1, vanS, vanG, vanT, gyrA, gyrB</i>                                       | 23S rRNA: C665T                       |
| DSS189      |        | RT106 | ST42  | 1          | <i>tcdA, tcdB</i> |               | CLR        | 23S rRNA, <i>blaCDD-1, vanZ1, vanS, vanG, vanT, tet(M), ermB, aac(6')-aph(2''), gyrA, gyrB</i>       | 23S rRNA: C665T                       |
| DSS190      |        | RT018 | ST17  | 1          | <i>tcdA, tcdB</i> |               |            | 23S rRNA, <i>blaCDD-1, vanZ1, vanS, vanG, vanT, gyrA, gyrB</i>                                       | 23S rRNA: C665T                       |
| DSS191      |        | RT020 | ST2   | 1          | <i>tcdA, tcdB</i> |               |            | 23S rRNA, <i>blaCDD-1, vanS, vanG, vanT, gyrA, gyrB</i>                                              | 23S rRNA: C665T                       |
| DSS202      |        | UC    | ST254 | 4          |                   |               |            | 23S rRNA, <i>blaCDD-2, vanZ1, gyrA, gyrB</i>                                                         | 23S rRNA: C665T                       |
| ASS20       | ASS    | RT012 | ST54  | 1          | <i>tcdA, tcdB</i> |               | CLR        | 23S rRNA, <i>blaCDD-2, aac(6')-aph(2''), ermB, tet(M), cdeA, vanZ1, vanS, vanG, vanT, gyrA, gyrB</i> | 23S rRNA: C665T                       |
| ASS21       |        | RT014 | ST2   | 1          | <i>tcdA, tcdB</i> |               |            | 23S rRNA, <i>blaCDD-1, vanZ1, vanS, vanG, vanT, gyrA, gyrB</i>                                       | 23S rRNA: C665T                       |
| ASS22       |        | RT014 | ST2   | 1          | <i>tcdA, tcdB</i> |               |            | 23S rRNA, <i>blaCDD-1, vanZ1, vanS, vanG, vanT, gyrA, gyrB</i>                                       | 23S rRNA: C665T                       |

**Table S1:** Continued.

| Isolate No. | Source | RTs   | STs  | MLST calde | Toxin genes       | Binary toxins | AR profile | AMR genes                                                                                        | Mutations and amino acid substitution |
|-------------|--------|-------|------|------------|-------------------|---------------|------------|--------------------------------------------------------------------------------------------------|---------------------------------------|
| ASS23       | ASS    | RT126 | ST11 | 5          | <i>tcdA, tcdB</i> | <i>cdtAB</i>  | CLR        | 23S rRNA, <i>blaCDD-1, vanZ1, aph(3')-IIIa, ant(6)-Ia, tet(40), tet(M), sat-4, gyrA, gyrB</i>    | 23S rRNA: C665T                       |
| ASS24       |        | RT126 | ST11 | 5          | <i>tcdA, tcdB</i> | <i>cdtAB</i>  | CLR        | 23S rRNA, <i>blaCDD-1, vanZ1, aph(3')-IIIa, ant(6)-Ia, tet(40), tet(M), sat-4, gyrA, gyrB</i>    | 23S rRNA: C665T                       |
| ASS25       |        | RT126 | ST11 | 5          | <i>tcdA, tcdB</i> | <i>cdtAB</i>  | CLR        | 23S rRNA, <i>blaCDD-1, vanZ1, aph(3')-IIIa, ant(6)-Ia, tet(40), tet(M), sat-4, gyrA, gyrB</i>    | 23S rRNA: C665T                       |
| S45         | S      | RT014 | ST2  | 1          | <i>tcdA, tcdB</i> |               |            | 23S rRNA, <i>blaCDD-1, vanZ1, vanS, vanG, vanT, cdeA, gyrA, gyrB</i>                             | 23S rRNA: C665T                       |
| CF69        | CF     | RT126 | ST11 | 5          | <i>tcdA, tcdB</i> | <i>cdtAB</i>  | CLR        | 23S rRNA, <i>blaCDD-1, vanZ1, aph(3')-IIIa, ant(6)-Ia, tet(40), tet(M), sat-4, gyrA, gyrB</i>    | 23S rRNA: C665T                       |
| CF70        |        | RT127 | ST11 | 5          | <i>tcdA, tcdB</i> | <i>cdtAB</i>  |            | 23S rRNA, <i>blaCDD-1, vanZ1, aph(3')-IIIa, tet(M), gyrA, gyrB</i>                               | 23S rRNA: C665T                       |
| CF72        |        | RT127 | ST11 | 5          | <i>tcdA, tcdB</i> | <i>cdtAB</i>  |            | 23S rRNA, <i>blaCDD-1, vanZ1, aph(3')-IIIa, tet(M), gyrA, gyrB</i>                               | 23S rRNA: C665T                       |
| CF73        |        | RT126 | ST11 | 5          | <i>tcdA, tcdB</i> | <i>cdtAB</i>  | CLR        | 23S rRNA, <i>blaCDD-1, vanZ1, aph(3')-IIIa, ant(6)-Ia, tet(40), tet(M), sat-4, gyrA, gyrB</i>    | 23S rRNA: C665T                       |
| CF74        |        | RT126 | ST11 | 5          | <i>tcdA, tcdB</i> | <i>cdtAB</i>  | CLR        | 23S rRNA, <i>blaCDD-1, vanZ1, aph(3')-IIIa, ant(6)-Ia, tet(40), tet(M), sat-4, gyrA, gyrB</i>    | 23S rRNA: C665T                       |
| CF75        |        | RT126 | ST11 | 5          | <i>tcdA, tcdB</i> | <i>cdtAB</i>  | CLR        | 23S rRNA, <i>blaCDD-1, vanZ1, aph(3')-IIIa, ant(6)-Ia, tet(40), tet(M), sat-4, gyrA, gyrB</i>    | 23S rRNA: C665T                       |
| CF76        |        | RT126 | ST11 | 5          | <i>tcdA, tcdB</i> | <i>cdtAB</i>  | CLR        | 23S rRNA, <i>blaCDD-1, vanZ1, aph(3')-IIIa, ant(6)-Ia, tet(40), tet(M), sat-4, gyrA, gyrB</i>    | 23S rRNA: C665T                       |
| CF77        |        | RT126 | ST11 | 5          | <i>tcdA, tcdB</i> | <i>cdtAB</i>  | CLR        | 23S rRNA, <i>blaCDD-1, vanZ1, aph(3')-IIIa, ant(6)-Ia, tet(40), tet(M), sat-4, gyrA, gyrB</i>    | 23S rRNA: C665T                       |
| CF78        |        | RT126 | ST11 | 5          | <i>tcdA, tcdB</i> | <i>cdtAB</i>  | CLR        | 23S rRNA, <i>blaCDD-1, vanZ1, aph(3')-IIIa, ant(6)-Ia, tet(M), sat-4, gyrA, gyrB</i>             | 23S rRNA: C665T                       |
| CF79        |        | RT126 | ST11 | 5          | <i>tcdA, tcdB</i> | <i>cdtAB</i>  | CLR        | 23S rRNA, <i>blaCDD-1, vanZ1, aph(3')-IIIa, ant(6)-Ia, tet(40), tet(M), sat-4, gyrA, gyrB</i>    | 23S rRNA: C665T                       |
| CF80        |        | RT126 | ST11 | 5          | <i>tcdA, tcdB</i> | <i>cdtAB</i>  | CLR, RIF   | 23S rRNA, <i>blaCDD-1, vanZ1, aph(3')-IIIa, ant(6)-Ia, tet(40), tet(M), sat-4, gyrA, gyrB</i>    | 23S rRNA: C665T                       |
| CF81        |        | RT126 | ST11 | 5          | <i>tcdA, tcdB</i> | <i>cdtAB</i>  | CLR        | 23S rRNA, <i>blaCDD-1, vanZ1, aph(3')-IIIa, ant(6)-Ia, tet(40), tet(M), sat-4, gyrA, gyrB</i>    | 23S rRNA: C665T                       |
| CF82        |        | RT126 | ST11 | 5          | <i>tcdA, tcdB</i> | <i>cdtAB</i>  | CLR, MXF   | 23S rRNA, <i>blaCDD-1, vanZ1, aph(3')-IIIa, ant(6)-Ia, tet(M), sat-4, npmA, mefH, gyrA, gyrB</i> | 23S rRNA: C665T                       |
| CF83        |        | RT126 | ST11 | 5          | <i>tcdA, tcdB</i> | <i>cdtAB</i>  |            | 23S rRNA, <i>blaCDD-1, vanZ1, aph(3')-IIIa, tet(M), gyrA, gyrB</i>                               | 23S rRNA: C665T                       |
| CF84        |        | RT126 | ST11 | 5          | <i>tcdA, tcdB</i> | <i>cdtAB</i>  | CLR, MXF   | 23S rRNA, <i>blaCDD-1, vanZ1, aph(3')-IIIa, ant(6)-Ia, tet(M), sat-4, npmA, mefH, gyrA, gyrB</i> | 23S rRNA: C665T                       |
| CF85        |        | RT126 | ST11 | 5          | <i>tcdA, tcdB</i> | <i>cdtAB</i>  | CLR, MXF   | 23S rRNA, <i>blaCDD-1, vanZ1, aph(3')-IIIa, ant(6)-Ia, tet(M), sat-4, npmA, mefH, gyrA, gyrB</i> | 23S rRNA: C665T                       |
| CF86        |        | RT126 | ST11 | 5          | <i>tcdA, tcdB</i> | <i>cdtAB</i>  | CLR, MXF   | 23S rRNA, <i>blaCDD-1, vanZ1, aph(3')-IIIa, ant(6)-Ia, tet(M), sat-4, npmA, mefH, gyrA, gyrB</i> | 23S rRNA: C665T                       |
| CF87        |        | RT126 | ST11 | 5          | <i>tcdA, tcdB</i> | <i>cdtAB</i>  | MXF        | 23S rRNA, <i>blaCDD-1, vanZ1, aph(3')-IIIa, ant(6)-Ia, tet(M), sat-4, npmA, mefH, gyrA, gyrB</i> | 23S rRNA: C665T                       |
| CF88        |        | RT127 | ST11 | 5          | <i>tcdA, tcdB</i> | <i>cdtAB</i>  |            | 23S rRNA, <i>blaCDD-1, vanZ1, aph(3')-IIIa, tet(M), gyrA, gyrB</i>                               | 23S rRNA: C665T                       |
| CF89        |        | RT127 | ST11 | 5          | <i>tcdA, tcdB</i> | <i>cdtAB</i>  |            | 23S rRNA, <i>blaCDD-1, vanZ1, aph(3')-IIIa, tet(M), gyrA, gyrB</i>                               | 23S rRNA: C665T                       |
| CF90        |        | RT127 | ST11 | 5          | <i>tcdA, tcdB</i> | <i>cdtAB</i>  |            | 23S rRNA, <i>blaCDD-1, vanZ1, aph(3')-IIIa, tet(M), gyrA, gyrB</i>                               | 23S rRNA: C665T                       |
| CF92        |        | RT127 | ST11 | 5          | <i>tcdA, tcdB</i> | <i>cdtAB</i>  |            | 23S rRNA, <i>blaCDD-1, vanZ1, aph(3')-IIIa, tet(M), gyrA, gyrB</i>                               | 23S rRNA: C665T                       |
| CF95        |        | RT126 | ST11 | 5          | <i>tcdA, tcdB</i> | <i>cdtAB</i>  | CLR, MXF   | 23S rRNA, <i>blaCDD-1, vanZ1, aph(3')-IIIa, ant(6)-Ia, tet(M), sat-4, npmA, mefH, gyrA, gyrB</i> | 23S rRNA: C665T                       |
| CF97        |        | UC    | ST11 | 5          | <i>tcdA, tcdB</i> | <i>cdtAB</i>  | CLR, MXF   | 23S rRNA, <i>blaCDD-1, vanZ1, aph(3')-IIIa, ant(6)-Ia, tet(M), sat-4, npmA, mefH, gyrA, gyrB</i> | 23S rRNA: C665T                       |
| CF99        |        | RT126 | ST11 | 5          | <i>tcdA, tcdB</i> | <i>cdtAB</i>  | CLR, MXF   | 23S rRNA, <i>blaCDD-1, vanZ1, aph(3')-IIIa, ant(6)-Ia, tet(M), sat-4, npmA, mefH, gyrA, gyrB</i> | 23S rRNA: C665T                       |
| CF101       |        | UC    | ST11 | 5          | <i>tcdA, tcdB</i> | <i>cdtAB</i>  |            | 23S rRNA, <i>blaCDD-1, gyrA, gyrB</i>                                                            | 23S rRNA: C665T                       |
| CF102       |        | UC    | ST11 | 5          | <i>tcdA, tcdB</i> | <i>cdtAB</i>  |            | 23S rRNA, <i>blaCDD-1, gyrA, gyrB</i>                                                            | 23S rRNA: C665T                       |
| CF103       |        | UC    | ST11 | 5          | <i>tcdA, tcdB</i> | <i>cdtAB</i>  |            | 23S rRNA, <i>blaCDD-1, gyrA, gyrB</i>                                                            | 23S rRNA: C665T                       |
| CF107       |        | RT126 | ST11 | 5          | <i>tcdA, tcdB</i> | <i>cdtAB</i>  |            | 23S rRNA, <i>blaCDD-1, vanZ1, aph(3')-IIIa, tet(M), gyrA, gyrB</i>                               | 23S rRNA: C665T                       |
| CF109       |        | RT127 | ST11 | 5          | <i>tcdA, tcdB</i> | <i>cdtAB</i>  |            | 23S rRNA, <i>blaCDD-1, vanZ1, aph(3')-IIIa, tet(M), gyrA, gyrB</i>                               | 23S rRNA: C665T                       |
| CF113       |        | RT127 | ST11 | 5          | <i>tcdA, tcdB</i> | <i>cdtAB</i>  |            | 23S rRNA, <i>blaCDD-1, vanZ1, aph(3')-IIIa, tet(M), gyrA, gyrB</i>                               | 23S rRNA: C665T                       |
| CF114       |        | UC    | ST11 | 5          | <i>tcdA, tcdB</i> | <i>cdtAB</i>  |            | 23S rRNA, <i>blaCDD-1, vanZ1, aph(3')-IIIa, tet(M), gyrA, gyrB</i>                               | 23S rRNA: C665T                       |

**Table S1:** Continued.

| Isolate No. | Source | RTs   | STs   | MLST calde | Toxin genes       | Binary toxins | AR profile | AMR genes                                                                                              | Mutations and amino acid substitution |
|-------------|--------|-------|-------|------------|-------------------|---------------|------------|--------------------------------------------------------------------------------------------------------|---------------------------------------|
| CF129       | CF     | RT127 | ST11  | 5          | <i>tcdA, tcdB</i> | <i>cdtAB</i>  |            | 23S rRNA, <i>blaCDD-1, vanZ1, aph(3')-IIIa, tet(M), gyrA, gyrB</i>                                     | 23S rRNA: C665T                       |
| CF132       |        | RT127 | ST11  | 5          | <i>tcdA, tcdB</i> | <i>cdtAB</i>  |            | 23S rRNA, <i>blaCDD-1, vanZ1, aph(3')-IIIa, tet(M), gyrA, gyrB</i>                                     | 23S rRNA: C665T                       |
| CF192       |        | RT127 | ST11  | 5          | <i>tcdA, tcdB</i> | <i>cdtAB</i>  |            | 23S rRNA, <i>blaCDD-1, 23S rRNA, vanZ1, aph(3')-IIIa, tet(M), gyrA, gyrB</i>                           | 23S rRNA: C665T                       |
| CF193       |        | RT127 | ST11  | 5          | <i>tcdA, tcdB</i> | <i>cdtAB</i>  |            | 23S rRNA, <i>blaCDD-1, vanZ1, aph(3')-IIIa, tet(M), gyrA, gyrB</i>                                     | 23S rRNA: C665T                       |
| CF194       |        | RT127 | ST11  | 5          | <i>tcdA, tcdB</i> | <i>cdtAB</i>  |            | 23S rRNA, <i>blaCDD-1, vanZ1, aph(3')-IIIa, tet(M), gyrA, gyrB</i>                                     | 23S rRNA: C665T                       |
| CF195       |        | RT127 | ST11  | 5          | <i>tcdA, tcdB</i> | <i>cdtAB</i>  |            | 23S rRNA, <i>blaCDD-1, vanZ1, aph(3')-IIIa, tet(M), gyrA, gyrB</i>                                     | 23S rRNA: C665T                       |
| CF196       |        | RT127 | ST11  | 5          | <i>tcdA, tcdB</i> | <i>cdtAB</i>  |            | 23S rRNA, <i>blaCDD-1, vanZ1, aph(3')-IIIa, tet(M), gyrA, gyrB</i>                                     | 23S rRNA: C665T                       |
| CF200       |        | RT126 | ST11  | 5          | <i>tcdA, tcdB</i> | <i>cdtAB</i>  | CLR, MXF   | 23S rRNA, <i>blaCDD-1, vanZ1, aph(3')-IIIa, ant(6)-Ia, tet(M), sat-4, npmA, mefH, gyrA, gyrB</i>       | 23S rRNA: C665T                       |
| BP71        | BP     | RT127 | ST11  | 5          | <i>tcdA, tcdB</i> | <i>cdtAB</i>  |            | 23S rRNA, <i>blaCDD-1, vanZ1, aph(3')-IIIa, tet(M), gyrA, gyrB</i>                                     | 23S rRNA: C665T                       |
| BP197       |        | RT127 | ST11  | 5          | <i>tcdA, tcdB</i> | <i>cdtAB</i>  |            | 23S rRNA <i>blaCDD-1, vanZ1, aph(3')-IIIa, tet(M), gyrA, gyrB</i>                                      | 23S rRNA: C665T                       |
| BP198       |        | RT127 | ST11  | 5          | <i>tcdA, tcdB</i> | <i>cdtAB</i>  |            | 23S rRNA, <i>blaCDD-1, vanZ1, aph(3')-IIIa, tet(M), gyrA, gyrB</i>                                     | 23S rRNA: C665T                       |
| BP199       |        | RT127 | ST11  | 5          | <i>tcdA, tcdB</i> | <i>cdtAB</i>  |            | 23S rRNA, <i>blaCDD-1, vanZ1, aph(3')-IIIa, tet(M), gyrA, gyrB</i>                                     | 23S rRNA: C665T                       |
| BP201       |        | RT127 | ST11  | 5          | <i>tcdA, tcdB</i> | <i>cdtAB</i>  |            | 23S rRNA, <i>blaCDD-1, vanZ1, aph(3')-IIIa, tet(M), gyrA, gyrB</i>                                     | 23S rRNA: C665T                       |
| TDS115      | TDS    | RT001 | ST3   | 1          | <i>tcdA, tcdB</i> |               |            | 23S rRNA, <i>blaCDD-1, vanZ1, vanS, vanG, vanT, gyrA, gyrB</i>                                         | 23S rRNA: C665T                       |
| TDS116      |        | RT076 | ST2   | 1          | <i>tcdA, tcdB</i> |               |            | 23S rRNA, <i>blaCDD-1, vanS, vanG, vanT, gyrA, gyrB</i>                                                | 23S rRNA: C665T                       |
| TDS117      |        | RT014 | ST49  | 1          | <i>tcdA, tcdB</i> |               |            | 23S rRNA, <i>blaCDD-1, vanS, vanG, vanT, gyrA, gyrB</i>                                                | 23S rRNA: C665T                       |
| TDS118      |        | RT140 | ST515 | 1          |                   |               | CLR, MXF   | 23S rRNA, <i>blaCDD-1, vanZ1, vanS, vanG, vanT, aph(2'')-Ij, tet(M), tet(O), ermB, ant(6)-Ia, gyrA</i> | 23S rRNA: C665T<br><i>gyrA</i> : T82I |
| TDS119      |        | RT014 | ST2   | 1          | <i>tcdA, tcdB</i> |               |            | 23S rRNA, <i>blaCDD-1, vanS, vanG, vanT, gyrA, gyrB</i>                                                | 23S rRNA: C665T                       |
| TDS120      |        | RT076 | ST2   | 1          | <i>tcdA, tcdB</i> |               |            | 23S rRNA, <i>blaCDD-1, vanS, vanG, vanT, gyrA, gyrB</i>                                                | 23S rRNA: C665T                       |
| TDS121      |        | RT076 | ST2   | 1          | <i>tcdA, tcdB</i> |               |            | 23S rRNA, <i>blaCDD-1, vanS, vanG, vanT, gyrA, gyrB</i>                                                | 23S rRNA: C665T                       |
| TDS122      |        | RT076 | ST2   | 1          | <i>tcdA, tcdB</i> |               |            | 23S rRNA, <i>blaCDD-1, vanS, vanG, vanT, gyrA, gyrB</i>                                                | 23S rRNA: C665T                       |
| TDS128      |        | RT127 | ST11  | 5          | <i>tcdA, tcdB</i> | <i>cdtAB</i>  |            | 23S rRNA, <i>blaCDD-1, vanZ1, aph(3')-IIIa, tet(M), gyrA, gyrB</i>                                     | 23S rRNA: C665T                       |
| TDB123      | TDB    | RT001 | ST3   | 1          | <i>tcdA, tcdB</i> |               |            | 23S rRNA, <i>blaCDD-1, vanZ1, vanS, vanG, vanT, gyrA, gyrB</i>                                         | 23S rRNA: C665T                       |
| TDB124      |        | RT023 | ST5   | 3          | <i>tcdA, tcdB</i> | <i>cdtAB</i>  |            | 23S rRNA, <i>blaCDD-1, vanZ1, gyrA, gyrB</i>                                                           | 23S rRNA: C665T                       |
| TDB126      |        | RT001 | ST3   | 1          | <i>tcdA, tcdB</i> |               |            | 23S rRNA, <i>blaCDD-1, vanZ1, vanS, vanG, vanT, gyrA, gyrB</i>                                         | 23S rRNA: C665T                       |
| TDB127      |        | RT023 | ST5   | 3          | <i>tcdA, tcdB</i> | <i>cdtAB</i>  |            | 23S rRNA, <i>blaCDD-1, vanZ1, gyrA, gyrB</i>                                                           | 23S rRNA: C665T                       |
| TDB130      |        | RT001 | ST3   | 1          | <i>tcdA, tcdB</i> |               |            | 23S rRNA, <i>blaCDD-1, vanZ1, vanS, vanG, vanT, gyrA, gyrB</i>                                         | 23S rRNA: C665T                       |
| TDB131      |        | RT001 | ST3   | 1          | <i>tcdA, tcdB</i> |               |            | 23S rRNA, <i>blaCDD-1, vanZ1, vanS, vanG, vanT, gyrA, gyrB</i>                                         | 23S rRNA: C665T                       |
| ARC134      | ARC    | RT095 | ST2   | 1          | <i>tcdA, tcdB</i> |               |            | 23S rRNA, <i>blaCDD-1, vanS, vanG, vanT, gyrA, gyrB</i>                                                | 23S rRNA: C665T                       |
| ARC135      |        | RT077 | ST13  | 1          | <i>tcdA, tcdB</i> |               |            | 23S rRNA, <i>blaCDD-1, vanZ1, vanS, vanG, vanT, gyrA, gyrB</i>                                         | 23S rRNA: C665T                       |
| ARC139      |        | RT015 | ST44  | 1          | <i>tcdA, tcdB</i> |               | MXF        | 23S rRNA, <i>blaCDD-1, vanZ1, vanS, vanG, vanT, gyrA, gyrB</i>                                         | 23S rRNA: C665T<br><i>gyrA</i> : D71G |
| ARC140      |        | RT014 | ST2   | 1          | <i>tcdA, tcdB</i> |               | CLR        | 23S rRNA, <i>blaCDD-1, vanZ1, vanS, vanG, vanT, aac(6')-aph(2''), ermB, gyrA, gyrB</i>                 | 23S rRNA: C665T                       |
| ARC141      |        | RT020 | ST2   | 1          | <i>tcdA, tcdB</i> |               |            | 23S rRNA, <i>blaCDD-1, vanS, vanG, vanT, gyrA, gyrB</i>                                                | 23S rRNA: C665T                       |

**Table S1:** Continued.

| Isolate No. | Source | RTs   | STs    | MLST calde | Toxin genes       | Binary toxins | AR profile | AMR genes                                                                                                 | Mutations and amino acid substitution                |
|-------------|--------|-------|--------|------------|-------------------|---------------|------------|-----------------------------------------------------------------------------------------------------------|------------------------------------------------------|
| ARC167      | ARC    | UC    | ST8    | 1          | <i>tcdA, tcdB</i> |               |            | 23S rRNA, <i>blaCDD-1, vanZ1, vanS, vanG, vanT, gyrA, gyrB</i>                                            | 23S rRNA: C665T                                      |
| ARC168      |        | RT159 | ST8    | 1          | <i>tcdA, tcdB</i> |               |            | 23S rRNA, <i>blaCDD-1, vanZ1, vanS, vanG, vanT, gyrA, gyrB</i>                                            | 23S rRNA: C665T                                      |
| ARC182      |        | RT005 | ST6    | 1          | <i>tcdA, tcdB</i> |               |            | 23S rRNA, <i>blaCDD-1, vanZ1, vanS, vanG, vanT, gyrA, gyrB</i>                                            | 23S rRNA: C665T                                      |
| ARE136      | ARE    | RT120 | ST4    | 1          | <i>tcdA, tcdB</i> |               |            | 23S rRNA, <i>blaCDD-2, vanZ1, vanS, vanG, vanT, gyrA, gyrB</i>                                            | 23S rRNA: C665T                                      |
| ARE137      |        | RT120 | ST4    | 1          | <i>tcdA, tcdB</i> |               |            | 23S rRNA, <i>blaCDD-2, vanZ1, vanS, vanG, vanT, gyrA, gyrB</i>                                            | 23S rRNA: C665T                                      |
| ARE138      |        | RT120 | ST4    | 1          | <i>tcdA, tcdB</i> |               |            | 23S rRNA, <i>blaCDD-2, vanZ1, vanS, vanG, vanT, gyrA, gyrB</i>                                            | 23S rRNA: C665T                                      |
| ARE143      |        | RT120 | ST4    | 1          | <i>tcdA, tcdB</i> |               |            | 23S rRNA, <i>blaCDD-2, vanZ1, vanS, vanG, vanT, gyrA, gyrB</i>                                            | 23S rRNA: C665T                                      |
| ARE144      |        | RT120 | ST4    | 1          | <i>tcdA, tcdB</i> |               |            | 23S rRNA, <i>blaCDD-2, vanZ1, vanS, vanG, vanT, gyrA, gyrB</i>                                            | 23S rRNA: C665T                                      |
| ARE145      |        | UC    | ST109  | 4          |                   |               |            | 23S rRNA, <i>blaCDD-2, vanZ1, gyrA, gyrB</i>                                                              | 23S rRNA: C665T                                      |
| ARE146      |        | RT085 | ST39   | 4          | <i>tcdA, tcdB</i> |               | CLR, RIF   | 23S rRNA, <i>blaCDD-2, vanZ1, ermB, tet(M), rpoB, gyrA, gyrB</i>                                          | 23S rRNA: C665T<br><i>rpoB</i> : His502Asn/Arg505Lys |
| ARE170      |        | RT120 | ST4    | 1          | <i>tcdA, tcdB</i> |               |            | 23S rRNA, <i>blaCDD-2, vanZ1, vanS, vanG, vanT, gyrA, gyrB</i>                                            | 23S rRNA: C665T                                      |
| DS155       | DSS-S  | RT078 | ST11   | 5          | <i>tcdA, tcdB</i> | <i>cdtAB</i>  |            | 23S rRNA, <i>blaCDD-1, vanZ1, ermB, gyrA, gyrB</i>                                                        | 23S rRNA: C665T                                      |
| DS156       |        | RT078 | ST11   | 5          | <i>tcdA, tcdB</i> | <i>cdtAB</i>  | CLR        | 23S rRNA, <i>blaCDD-1, vanZ1, ermB, gyrA, gyrB</i>                                                        | 23S rRNA: C665T                                      |
| DS157       |        | RT001 | ST3    | 1          | <i>tcdA, tcdB</i> |               | CLR, MXF   | 23S rRNA, <i>blaCDD-1, vanS, vanG, vanT, aac(6')-aph(2''), tetB(P), tetA(P), ermB, gyrA, gyrB</i>         | 23S rRNA: C665T<br><i>gyrA</i> : T82I                |
| DS158       |        | RT126 | ST11   | 5          | <i>tcdA, tcdB</i> | <i>cdtAB</i>  | CLR, MXF   | 23S rRNA, <i>blaCDD-1, vanZ1, aph(3')-IIIa, ant(6)-Ia, tet(M), sat-4, ermB, gyrA, gyrB, aad9</i>          | 23S rRNA: C665T<br><i>gyrA</i> : T82A                |
| DS159       |        | RT126 | ST11   | 5          | <i>tcdA, tcdB</i> | <i>cdtAB</i>  | CLR, MXF   | 23S rRNA, <i>blaCDD-1, vanZ1, aph(3')-IIIa, ant(6)-Ia, tet(M), sat-4, ermB, gyrA, gyrB, aad9, tet(40)</i> | 23S rRNA: C665T<br><i>gyrA</i> : T82A                |
| DS160       |        | UC    | ST1074 | UC         |                   |               |            | 23S rRNA, <i>blaCDD-2</i>                                                                                 | 23S rRNA: C665T                                      |
| DS161       |        | RT001 | ST3    | 1          | <i>tcdA, tcdB</i> |               | CLR, MXF   | 23S rRNA, <i>blaCDD-1, vanS, vanG, vanT, aac(6')-aph(2''), tetB(P), tetA(P), ermB, gyrA, gyrB</i>         | 23S rRNA: C665T<br><i>gyrA</i> : T82I                |
| DS162       |        | RT078 | ST11   | 5          | <i>tcdA, tcdB</i> | <i>cdtAB</i>  | MXF        | 23S rRNA, <i>blaCDD-1, vanZ1, aph(3')-IIIa, sat-4, ant(6)-Ia, gyrA, gyrB</i>                              | 23S rRNA: C665T<br><i>gyrA</i> : T82I                |
| DS163       |        | RT001 | ST3    | 1          | <i>tcdA, tcdB</i> |               |            | 23S rRNA, <i>blaCDD-1, vanZ1, vanS, vanG, vanT, gyrA, gyrB</i>                                            | 23S rRNA: C665T                                      |
| DS169       |        | UC    | ST821  | UC         |                   |               |            | 23S rRNA, <i>blaCDD-2, gyrA, gyrB</i>                                                                     | 23S rRNA: C665T                                      |
| DS171       |        | RT078 | ST11   | 5          | <i>tcdA, tcdB</i> | <i>cdtAB</i>  | MXF        | 23S rRNA, <i>blaCDD-1, vanZ1, aph(3')-IIIa, ant(6)-Ia, tet(M), sat-4, gyrA, gyrB, spw</i>                 | 23S rRNA: C665T<br><i>gyrA</i> : T82I                |
| DS173       |        | RT078 | ST11   | 5          | <i>tcdA, tcdB</i> | <i>cdtAB</i>  | MXF        | 23S rRNA, <i>blaCDD-1, vanZ1, aph(3')-IIIa, ant(6)-Ia, sat-4, gyrA, gyrB</i>                              | 23S rRNA: C665T<br><i>gyrA</i> : T82I                |
| DS174       |        | RT078 | ST11   | 5          | <i>tcdA, tcdB</i> | <i>cdtAB</i>  | MXF        | 23S rRNA, <i>blaCDD-1, vanZ1, aph(3')-IIIa, ant(6)-Ia, sat-4, gyrA, gyrB</i>                              | 23S rRNA: C665T<br><i>gyrA</i> : T82I                |
| DS175       |        | RT078 | ST11   | 5          | <i>tcdA, tcdB</i> | <i>cdtAB</i>  | CLR        | 23S rRNA, <i>blaCDD-1, vanZ1, sat-4, ant(6)-Ia, tet(40), aph(3')-IIIa, gyrA, gyrB</i>                     | 23S rRNA: C665T                                      |
| DS176       |        | RT078 | ST11   | 5          | <i>tcdA, tcdB</i> | <i>cdtAB</i>  | CLR        | 23S rRNA, <i>blaCDD-1, vanZ1, sat-4, ant(6)-Ia, tet(40), aph(3')-IIIa</i>                                 | 23S rRNA: C665T                                      |

**Table S1:** Continued.

| Isolate No. | Source | RTs   | STs  | MLST<br>calde | Toxin<br>genes    | Binary<br>toxins | AR profile | AMR genes                                                                                                 | Mutations and<br>amino acid<br>substitution |
|-------------|--------|-------|------|---------------|-------------------|------------------|------------|-----------------------------------------------------------------------------------------------------------|---------------------------------------------|
| DS177       | DSS-S  | RT078 | ST11 | 5             | <i>tcdA, tcdB</i> | <i>cdtAB</i>     | MXF, CLR   | 23S rRNA, <i>blaCDD-1, vanZ1, ermB, gyrA, gyrB</i>                                                        | 23S rRNA: C665T                             |
| DS178       |        | RT120 | ST4  | 1             | <i>tcdA, tcdB</i> |                  |            | 23S rRNA, <i>blaCDD-2, vanZ1, vanS, vanG, vanT, gyrA, gyrB</i>                                            | 23S rRNA: C665T                             |
| DS179       |        | RT078 | ST11 | 5             | <i>tcdA, tcdB</i> | <i>cdtAB</i>     |            | 23S rRNA, <i>blaCDD-1, vanZ1, spw, ant(6)-Ia, tet(M), gyrA, gyrB</i>                                      | 23S rRNA: C665T                             |
| DS180       |        | RT078 | ST11 | 5             | <i>tcdA, tcdB</i> | <i>cdtAB</i>     |            | 23S rRNA, <i>blaCDD-1, vanZ1, spw, ant(6)-Ia, tet(M), gyrA, gyrB</i>                                      | 23S rRNA: C665T                             |
| DS181       |        | RT126 | ST11 | 5             | <i>tcdA, tcdB</i> | <i>cdtAB</i>     | MXF, CLR   | 23S rRNA, <i>blaCDD-1, vanZ1, aph(3')-IIIa, ant(6)-Ia, tet(M), sat-4, aad9, gyrA, gyrB, tet(40), ermB</i> | 23S rRNA: C665T<br><i>gyrA</i> : T82A       |

RSS: raw sewage sludge, AR: antimicrobial resistance, AMR: antimicrobial resistance, CLR: clarithromycin, MXF: moxifloxacin, RIF: rifampicin, RS: raw sewage, ASS: activated sewage sludge, DSS: digested sewage sludge, CF: calf feces, BP: biogas plant digestate, S: soil; ARC/E: anaerobic lab scale bioreactors treating sewage sludge (control and experiment), DSS-S: digested sewage sludge-amended soils, TDS: thermophilic digester for treating sewage sludge, TDB: thermophilic digester for treating biowaste, UC: unclassified.

**Table S2:** Distribution of *C. difficile* RTs (*n* = 166) in diverse Environmental samples.

| Source       | RTs |     |     |     |     |     |     |     |     |     |     |     |     |    |     |     |
|--------------|-----|-----|-----|-----|-----|-----|-----|-----|-----|-----|-----|-----|-----|----|-----|-----|
|              | 005 | 090 | 011 | 014 | 070 | 159 | 015 | 012 | 010 | 140 | 023 | 018 | 001 | UC | 078 | 020 |
| ASS          | 0   | 0   | 0   | 2   | 0   | 0   | 0   | 1   | 0   | 0   | 0   | 0   | 0   | 0  | 0   | 0   |
| RS           | 0   | 0   | 1   | 1   | 2   | 0   | 1   | 1   | 0   | 0   | 1   | 1   | 4   | 1  | 0   | 0   |
| RSS          | 1   | 1   | 1   | 0   | 1   | 1   | 0   | 1   | 1   | 2   | 1   | 0   | 1   | 1  | 0   | 1   |
| DSS          | 0   | 0   | 0   | 1   | 0   | 0   | 1   | 0   | 0   | 0   | 0   | 2   | 0   | 3  | 0   | 2   |
| CF           | 0   | 0   | 0   | 0   | 0   | 0   | 0   | 0   | 0   | 0   | 0   | 0   | 0   | 5  | 0   | 0   |
| BP           | 0   | 0   | 0   | 0   | 0   | 0   | 0   | 0   | 0   | 0   | 0   | 0   | 0   | 0  | 0   | 0   |
| TD/TDB       | 0   | 0   | 0   | 2   | 0   | 0   | 0   | 0   | 0   | 1   | 2   | 0   | 5   | 0  | 0   | 0   |
| DSS-S        | 0   | 0   | 0   | 0   | 0   | 0   | 0   | 0   | 0   | 0   | 0   | 0   | 3   | 2  | 11  | 0   |
| S            | 0   | 0   | 0   | 1   | 0   | 0   | 0   | 0   | 0   | 0   | 0   | 0   | 0   | 0  | 0   | 0   |
| ARC/E        | 1   | 0   | 0   | 1   | 0   | 1   | 1   | 0   | 0   | 0   | 0   | 0   | 0   | 2  | 0   | 1   |
| <b>Total</b> | 2   | 1   | 2   | 8   | 3   | 2   | 3   | 3   | 1   | 3   | 4   | 3   | 13  | 14 | 11  | 4   |

| Source       | RTs |     |     |     |     |     |     |     |     |     |     |     |     |     |     |  |
|--------------|-----|-----|-----|-----|-----|-----|-----|-----|-----|-----|-----|-----|-----|-----|-----|--|
|              | 126 | 258 | 106 | 103 | 031 | 017 | 002 | 127 | 076 | 095 | 077 | 120 | 085 | 073 | 328 |  |
| ASS          | 3   | 0   | 0   | 0   | 0   | 0   | 0   | 0   | 0   | 0   | 0   | 0   | 0   | 0   | 0   |  |
| RS           | 0   | 0   | 0   | 0   | 0   | 0   | 1   | 0   | 0   | 0   | 0   | 0   | 0   | 7   | 0   |  |
| RSS          | 0   | 0   | 0   | 0   | 1   | 1   | 0   | 8   | 0   | 0   | 0   | 0   | 0   | 0   | 0   |  |
| DSS          | 1   | 3   | 2   | 1   | 0   | 0   | 1   | 0   | 0   | 0   | 0   | 0   | 0   | 0   | 2   |  |
| CF           | 20  | 0   | 0   | 0   | 0   | 0   | 0   | 15  | 0   | 0   | 0   | 0   | 0   | 0   | 0   |  |
| BP           | 0   | 0   | 0   | 0   | 0   | 0   | 0   | 5   | 0   | 0   | 0   | 0   | 0   | 0   | 0   |  |
| TD/TDB       | 0   | 0   | 0   | 0   | 0   | 0   | 0   | 1   | 4   | 0   | 0   | 0   | 0   | 0   | 0   |  |
| DSS-S        | 3   | 0   | 0   | 0   | 0   | 0   | 0   | 0   | 0   | 0   | 0   | 1   | 0   | 0   | 0   |  |
| S            | 0   | 0   | 0   | 0   | 0   | 0   | 0   | 0   | 0   | 0   | 0   | 0   | 0   | 0   | 0   |  |
| ARC/E        | 0   | 0   | 0   | 0   | 0   | 0   | 0   | 0   | 0   | 1   | 1   | 6   | 1   | 0   | 0   |  |
| <b>Total</b> | 27  | 3   | 2   | 1   | 1   | 1   | 2   | 29  | 4   | 1   | 1   | 7   | 1   | 7   | 2   |  |

ASS: activated sewage sludge, RS: raw sewage, RSS: raw sewage sludge, DSS: digested sewage sludge, CF: calf feces, BP: biogas plant digestate, TD/TDB: thermophilic digester for sewage sludge or biowaste, DSS-S: digested sludge-amended soils, S: soil; ARC/E: anaerobic lab scale bioreactors treating sewage sludge (control and experiment), UC: unclassified.

**Table S3:** Toxin-encoding gene profiles of *C. difficile* RT strains ( $n = 166$ ) from various environmental samples. UC: unclassified.

| RT    | No. of strains | <i>tcdA</i> <sup>+</sup> / <i>tcdB</i> <sup>+</sup> | <i>tcdA</i> <sup>+</sup> / <i>tcdB</i> <sup>+</sup> / <i>cdtAB</i> <sup>+</sup> | <i>tcdA</i> <sup>-</sup> / <i>tcdB</i> <sup>-</sup> / <i>cdtAB</i> <sup>-</sup> |
|-------|----------------|-----------------------------------------------------|---------------------------------------------------------------------------------|---------------------------------------------------------------------------------|
| RT005 | 2              | 2                                                   | 0                                                                               | 0                                                                               |
| RT090 | 1              | 1                                                   | 0                                                                               | 0                                                                               |
| RT011 | 2              | 2                                                   | 0                                                                               | 0                                                                               |
| RT020 | 4              | 4                                                   | 0                                                                               | 0                                                                               |
| RT014 | 8              | 8                                                   | 0                                                                               | 0                                                                               |
| RT070 | 3              | 3                                                   | 0                                                                               | 0                                                                               |
| RT159 | 2              | 2                                                   | 0                                                                               | 0                                                                               |
| RT012 | 3              | 3                                                   | 0                                                                               | 0                                                                               |
| RT010 | 1              | 0                                                   | 0                                                                               | 1                                                                               |
| RT140 | 3              | 0                                                   | 0                                                                               | 3                                                                               |
| RT023 | 4              | 0                                                   | 4                                                                               | 0                                                                               |
| RT031 | 1              | 0                                                   | 0                                                                               | 1                                                                               |
| RT001 | 13             | 13                                                  | 0                                                                               | 0                                                                               |
| RT017 | 1              | 1                                                   | 0                                                                               | 0                                                                               |
| RT127 | 29             | 0                                                   | 29                                                                              | 0                                                                               |
| RT015 | 3              | 3                                                   | 0                                                                               | 0                                                                               |
| RT018 | 3              | 3                                                   | 0                                                                               | 0                                                                               |
| RT002 | 2              | 2                                                   | 0                                                                               | 0                                                                               |
| RT073 | 7              | 0                                                   | 0                                                                               | 7                                                                               |
| RT258 | 3              | 3                                                   | 0                                                                               | 0                                                                               |
| RT126 | 27             | 0                                                   | 27                                                                              | 0                                                                               |
| RT076 | 4              | 4                                                   | 0                                                                               | 0                                                                               |
| RT095 | 1              | 1                                                   | 0                                                                               | 0                                                                               |
| RT077 | 1              | 1                                                   | 0                                                                               | 0                                                                               |
| RT120 | 7              | 7                                                   | 0                                                                               | 0                                                                               |
| RT085 | 1              | 1                                                   | 0                                                                               | 0                                                                               |
| RT078 | 11             | 0                                                   | 11                                                                              | 0                                                                               |
| RT106 | 2              | 2                                                   | 0                                                                               | 0                                                                               |
| RT328 | 2              | 2                                                   | 0                                                                               | 0                                                                               |
| RT103 | 1              | 1                                                   | 0                                                                               | 0                                                                               |
| UC    | 15             | 3                                                   | 5                                                                               | 6                                                                               |
| Total | 166            | 72                                                  | 76                                                                              | 18                                                                              |



**Table S4:** Distribution of *C. difficile* STs (*n* = 166) in diverse environmental samples.

| Source  | STs |   |      |    |    |    |   |    |     |    |    |    |   |    |    |    |      |    |     |    |    |    |    |    |    |     |    |     |   |     |    |    |   |  |
|---------|-----|---|------|----|----|----|---|----|-----|----|----|----|---|----|----|----|------|----|-----|----|----|----|----|----|----|-----|----|-----|---|-----|----|----|---|--|
|         | 821 | 6 | 1073 | 36 | 2  | 55 | 8 | 44 | 254 | 54 | 15 | 26 | 5 | 14 | 17 | 39 | 1074 | 3  | 917 | 11 | 58 | 42 | 29 | 37 | 13 | 325 | 49 | 515 | 4 | 109 | 35 | 53 |   |  |
| ASS     | 0   | 0 | 0    | 0  | 2  | 0  | 0 | 0  | 0   | 1  | 0  | 0  | 0 | 0  | 0  | 0  | 0    | 0  | 0   | 3  | 0  | 0  | 0  | 0  | 0  | 0   | 0  | 0   | 0 | 0   | 0  | 0  | 0 |  |
| RS      | 0   | 0 | 0    | 0  | 0  | 2  | 1 | 1  | 1   | 1  | 0  | 0  | 1 | 1  | 1  | 0  | 0    | 4  | 0   | 0  | 0  | 0  | 0  | 0  | 0  | 1   | 0  | 0   | 0 | 0   | 7  | 0  | 0 |  |
| RSS     | 0   | 2 | 1    | 1  | 1  | 1  | 1 | 0  | 0   | 1  | 1  | 2  | 1 | 0  | 0  | 0  | 0    | 1  | 0   | 8  | 0  | 0  | 1  | 1  | 0  | 0   | 0  | 0   | 0 | 0   | 0  | 0  | 0 |  |
| DSS     | 0   | 0 | 0    | 0  | 2  | 0  | 2 | 1  | 1   | 0  | 0  | 0  | 0 | 0  | 2  | 0  | 0    | 0  | 1   | 1  | 3  | 2  | 0  | 0  | 1  | 0   | 0  | 0   | 0 | 0   | 2  | 1  | 0 |  |
| CF      | 0   | 0 | 0    | 0  | 0  | 0  | 0 | 0  | 0   | 0  | 0  | 0  | 0 | 0  | 0  | 0  | 0    | 0  | 0   | 40 | 0  | 0  | 0  | 0  | 0  | 0   | 0  | 0   | 0 | 0   | 0  | 0  | 0 |  |
| BP      | 0   | 0 | 0    | 0  | 0  | 0  | 0 | 0  | 0   | 0  | 0  | 0  | 0 | 0  | 0  | 0  | 0    | 0  | 0   | 5  | 0  | 0  | 0  | 0  | 0  | 0   | 0  | 0   | 0 | 0   | 0  | 0  | 0 |  |
| TD/TDB  | 0   | 0 | 0    | 0  | 5  | 0  | 0 | 0  | 0   | 0  | 0  | 0  | 2 | 0  | 0  | 0  | 0    | 5  | 0   | 1  | 0  | 0  | 0  | 0  | 0  | 0   | 1  | 1   | 0 | 0   | 0  | 0  | 0 |  |
| DSS-S   | 1   | 0 | 0    | 0  | 0  | 0  | 0 | 0  | 0   | 0  | 0  | 0  | 0 | 0  | 0  | 0  | 1    | 3  | 0   | 14 | 0  | 0  | 0  | 0  | 0  | 0   | 0  | 0   | 0 | 0   | 0  | 0  | 0 |  |
| S       | 0   | 0 | 0    | 0  | 1  | 0  | 0 | 0  | 0   | 0  | 0  | 0  | 0 | 0  | 0  | 0  | 0    | 0  | 0   | 0  | 0  | 0  | 0  | 0  | 0  | 0   | 0  | 0   | 0 | 0   | 0  | 0  | 0 |  |
| AR-C/-E | 0   | 1 | 0    | 0  | 3  | 0  | 2 | 1  | 0   | 0  | 0  | 0  | 0 | 0  | 0  | 1  | 0    | 0  | 0   | 0  | 0  | 0  | 0  | 0  | 1  | 0   | 0  | 0   | 6 | 1   | 0  | 0  | 0 |  |
| Total   | 1   | 3 | 1    | 1  | 13 | 3  | 6 | 3  | 2   | 3  | 1  | 2  | 4 | 1  | 3  | 1  | 1    | 13 | 1   | 72 | 3  | 2  | 1  | 1  | 2  | 1   | 1  | 1   | 6 | 8   | 2  | 1  | 1 |  |

ASS: activated sewage sludge, RS: raw sewage, RSS: raw sewage sludge, DSS: digested sewage sludge, CF: calf feces, BP: biogas plants, TD/TDB: thermophilic digester for sewage sludge or biowaste, DSS-S: digested sludge-amended soils, S: soil; ARC/E: anaerobic lab scale bioreactors treating sewage sludge (control and experiment).

**Table S5:** Toxin-encoding gene profiles of *C. difficile* ST strains ( $n = 166$ ) isolated from various environmental samples.

| ST     | No. of strains | <i>tcdA</i> <sup>+</sup> / <i>tcdB</i> <sup>+</sup> | <i>tcdA</i> <sup>+</sup> / <i>tcdB</i> <sup>+</sup> / <i>cdtAB</i> <sup>+</sup> | <i>tcdA</i> <sup>-</sup> / <i>tcdB</i> <sup>-</sup> / <i>cdtAB</i> <sup>-</sup> |
|--------|----------------|-----------------------------------------------------|---------------------------------------------------------------------------------|---------------------------------------------------------------------------------|
| ST6    | 3              | 3                                                   | 0                                                                               | 0                                                                               |
| ST1073 | 1              | 1                                                   | 0                                                                               | 0                                                                               |
| ST36   | 1              | 1                                                   | 0                                                                               | 0                                                                               |
| ST2    | 14             | 14                                                  | 0                                                                               | 0                                                                               |
| ST55   | 3              | 3                                                   | 0                                                                               | 0                                                                               |
| ST8    | 6              | 6                                                   | 0                                                                               | 0                                                                               |
| ST54   | 3              | 3                                                   | 0                                                                               | 0                                                                               |
| ST15   | 1              | 0                                                   | 0                                                                               | 1                                                                               |
| ST26   | 2              | 0                                                   | 0                                                                               | 2                                                                               |
| ST5    | 4              | 0                                                   | 4                                                                               | 0                                                                               |
| ST29   | 1              | 0                                                   | 0                                                                               | 1                                                                               |
| ST3    | 13             | 13                                                  | 0                                                                               | 0                                                                               |
| ST37   | 1              | 1                                                   | 0                                                                               | 0                                                                               |
| ST11   | 72             | 0                                                   | 72                                                                              | 0                                                                               |
| ST44   | 3              | 3                                                   | 0                                                                               | 0                                                                               |
| ST254  | 2              | 0                                                   | 0                                                                               | 2                                                                               |
| ST14   | 1              | 1                                                   | 0                                                                               | 0                                                                               |
| ST17   | 3              | 3                                                   | 0                                                                               | 0                                                                               |
| ST325  | 1              | 1                                                   | 0                                                                               | 0                                                                               |
| ST109  | 8              | 0                                                   | 0                                                                               | 8                                                                               |
| ST917  | 1              | 0                                                   | 0                                                                               | 1                                                                               |
| ST58   | 3              | 3                                                   | 0                                                                               | 0                                                                               |
| ST13   | 2              | 2                                                   | 0                                                                               | 0                                                                               |
| ST35   | 2              | 2                                                   | 0                                                                               | 0                                                                               |
| ST53   | 1              | 1                                                   | 0                                                                               | 0                                                                               |
| ST42   | 2              | 2                                                   | 0                                                                               | 0                                                                               |
| ST515  | 1              | 0                                                   | 0                                                                               | 1                                                                               |
| ST4    | 7              | 7                                                   | 0                                                                               | 0                                                                               |
| ST39   | 1              | 1                                                   | 0                                                                               | 0                                                                               |
| ST1074 | 1              | 0                                                   | 0                                                                               | 1                                                                               |
| ST821  | 1              | 0                                                   | 0                                                                               | 1                                                                               |
| ST49   | 1              | 1                                                   | 0                                                                               | 0                                                                               |
| Total  | 166            | 72                                                  | 76                                                                              | 18                                                                              |

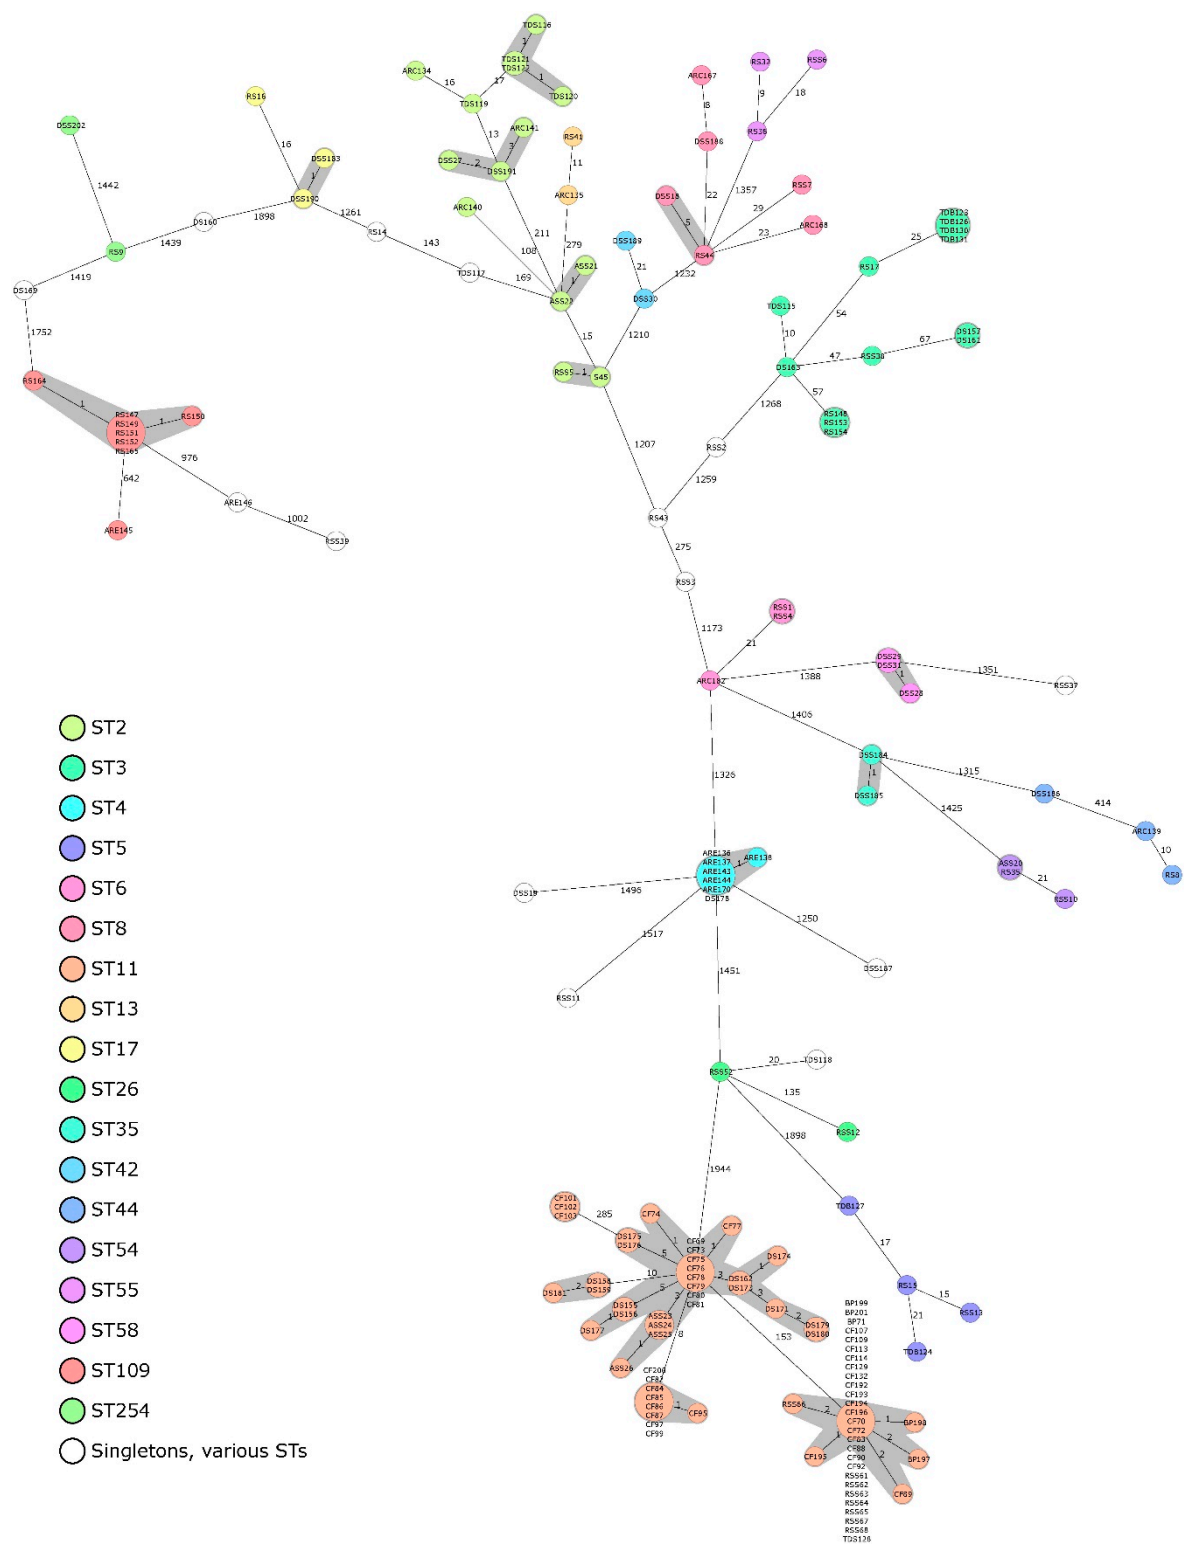

**Figure S1:** Minimum-spanning tree based on allelic profiles of 166 *C. difficile* isolates. Each circle represents a separate genotype and distances between two genotypes are based on the allelic profiles of up to 2,147 target genes, pairwise ignoring missing targets. The values on the connecting lines indicate the number of allelic differences between the connected isolates. Circle sizes are proportional to the numbers of isolates per genotype (i.e., the allelic profile). Related genotypes ( $\leq 6$  alleles distance) are shaded in grey and the isolates are colored according to their ST. RSS: raw sewage sludge, RS: raw sewage, ASS: activated sewage sludge, DSS: digested sewage sludge, CF: calf feces, BP: biogas plant digestate, ARC/E: anaerobic lab-scale bioreactors treating sewage sludge (control and experiment), DSS-S: digested sewage sludge-amended soils, TDS: thermophilic digester for treating sewage sludge, TDB: thermophilic digester for treating biowaste, S: soil.
